# Supplementary material
Source: PubMed Central journal article supplement (PMC2464412)
Supplement: supp_23_3_172__1.pdf [file supp_23_3_172__1.pdf]

## APPENDICES

### Appendix 1

Appraisal table for diagnostic studies.

|                           |                                                                                                                                                                           |
|---------------------------|---------------------------------------------------------------------------------------------------------------------------------------------------------------------------|
| <b>REFERENCE STANDARD</b> | Test(s) blinded to CTPA                                                                                                                                                   |
| <b>PATIENTS</b>           | Consecutive recruiting<br>Details of recruitment process<br>Number of centres<br>Prevalence of PE                                                                         |
| <b>INCLUDED PATIENTS</b>  | Inclusion criteria<br>Inpatient/outpatient mix<br>Co-morbidity<br>Record of all previous diagnostic tests                                                                 |
| <b>EXCLUDED PATIENTS</b>  | Exclusion criteria<br>Demographics of those excluded                                                                                                                      |
| <b>CTPA</b>               | Interpreted blind to reference standard<br>Description of technique and CT model<br>Description of diagnostic criteria for PE<br>Interpreted by at least two radiologists |

CTPA: computer tomography pulmonary angiogram, CT: computer tomography, PE: pulmonary embolism.

## Appendix 2

### Appraisal table for follow-up studies

|                          |                                                                                                                                                                                                                                                                                     |
|--------------------------|-------------------------------------------------------------------------------------------------------------------------------------------------------------------------------------------------------------------------------------------------------------------------------------|
| <b>FOLLOW-UP</b>         | Outcomes are both PE and DVT<br>Uniform approach, all patients underwent the same assessment following the CTPA<br>Details of all additional tests given<br>Involves personal contact with the patient<br>Lasted a minimum of three months<br>Deaths assessed by a panel of experts |
| <b>PATIENTS</b>          | Consecutive recruiting<br>Details of recruitment process<br>Number of centres<br>Prevalence of PE                                                                                                                                                                                   |
| <b>INCLUDED PATIENTS</b> | Inclusion criteria<br>Inpatient/outpatient mix<br>Co-morbidity<br>Record of all previous diagnostic tests                                                                                                                                                                           |
| <b>EXCLUDED PATIENTS</b> | Exclusion criteria<br>Demographics of those excluded                                                                                                                                                                                                                                |
| <b>CTPA</b>              | Description of technique and CT model<br>Description of diagnostic criteria for PE                                                                                                                                                                                                  |

CTPA: computer tomography pulmonary angiogram, CT: computer tomography, PE: pulmonary embolism, DVT: deep vein thrombosis.
